# Supplementary material for: Facile Synthesis of Novel Coumarin Derivatives, Antimicrobial Analysis, Enzyme Assay, Docking Study, ADMET Prediction and Toxicity Study
Source: PubMed Central journal article supplement (PMC6152127; doi:10.3390/molecules22071172), 2017-07-13

## Supplementary Material

### **Facile Synthesis Of Novel Coumarin Derivatives, Antimicrobial analysis, Enzyme Assay, Docking Study, ADMET Prediction And Toxicity Study.**

Shailee V. Tiwari <sup>1</sup>, Julio A. Seijas <sup>2</sup>, Maria Pilar Vazquez-Tato <sup>2</sup>, Aniket P. Sarkate <sup>3</sup>, Kshipra S. Karnik<sup>3</sup> and Anna Pratima G. Nikalje <sup>1\*</sup>

<sup>1</sup> Y.B. Chavan College of Pharmacy, Dr. Rafiq Zakaria Campus, Rauza Baug, Aurangabad, Maharashtra 431001, India; [shailee2010@gmail.com](mailto:shailee2010@gmail.com)

<sup>2</sup> Departamento de Química Orgánica, Facultad de Ciencias, Universidad of Santiago De Compostela, Alfonso X el Sabio, Lugo 27002, Spain; [julioa.seijas@usc.es](mailto:julioa.seijas@usc.es) (J.A.S.); [pilar.vazquez.tato@usc.es](mailto:pilar.vazquez.tato@usc.es) (M.P.V.-T.)

<sup>3</sup> Department of Chemical Technology, Dr. Babasaheb Ambedkar Marathwada University, Aurangabad 431004, Maharashtra, India.

\* Correspondence: [annapratimanikalje@gmail.com](mailto:annapratimanikalje@gmail.com) ; Tel.: +91-916-892-9111

**Table S1** Effect of [Et<sub>3</sub>NH][HSO<sub>4</sub>] catalyst concentration on model reaction **4a**

| <b>Entry</b> | <b>[Et<sub>3</sub>NH][HSO<sub>4</sub>] mol%</b> | <b>Time (min)</b> | <b>Yield (%)</b> |
|--------------|-------------------------------------------------|-------------------|------------------|
| 1.           | No catalyst                                     | 90                | Trace            |
| 2.           | 5                                               | 85                | 72               |
| 3.           | 10                                              | 60                | 85               |
| 4.           | 15                                              | 50                | 90               |
| 5.           | 20                                              | 30                | 92               |
| 6.           | 25                                              | 30                | 92               |

**Table S2** Reusability of [Et<sub>3</sub>NH][HSO<sub>4</sub>] catalyst for model reaction **4a**

| <b>Entry</b> | <b>Run</b> | <b>Time</b> | <b>Yield</b> |
|--------------|------------|-------------|--------------|
| 1.           | 1          | 30          | 92           |
| 2.           | 2          | 30          | 92           |
| 3.           | 3          | 30          | 90           |
| 4.           | 4          | 30          | 88           |
| 5.           | 5          | 30          | 88           |

<sup>1</sup>H NMR 4b

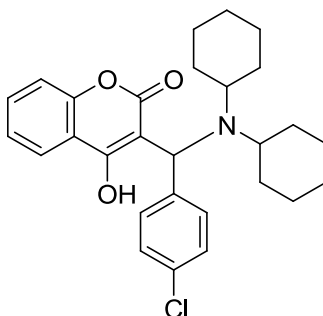

3-((4-chlorophenyl)(dicyclohexylamino)methyl)-4-hydroxy-2H-chromen-2-one

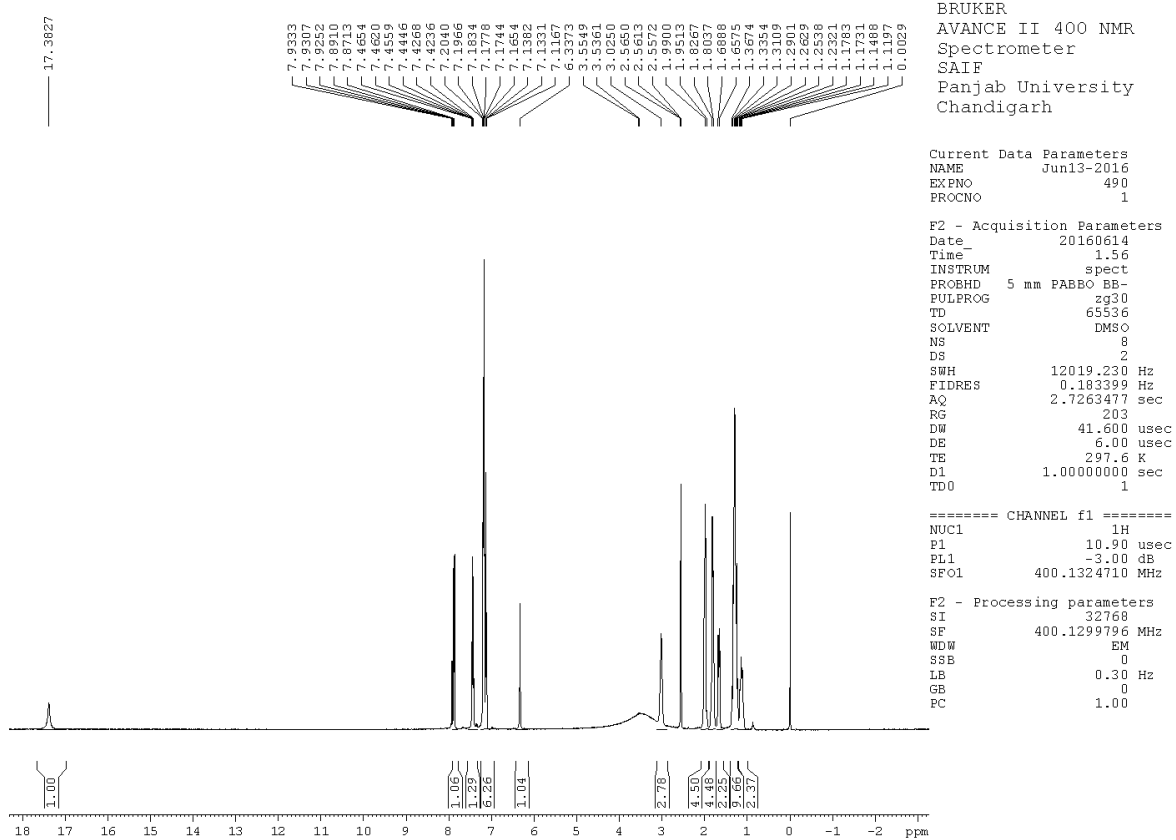

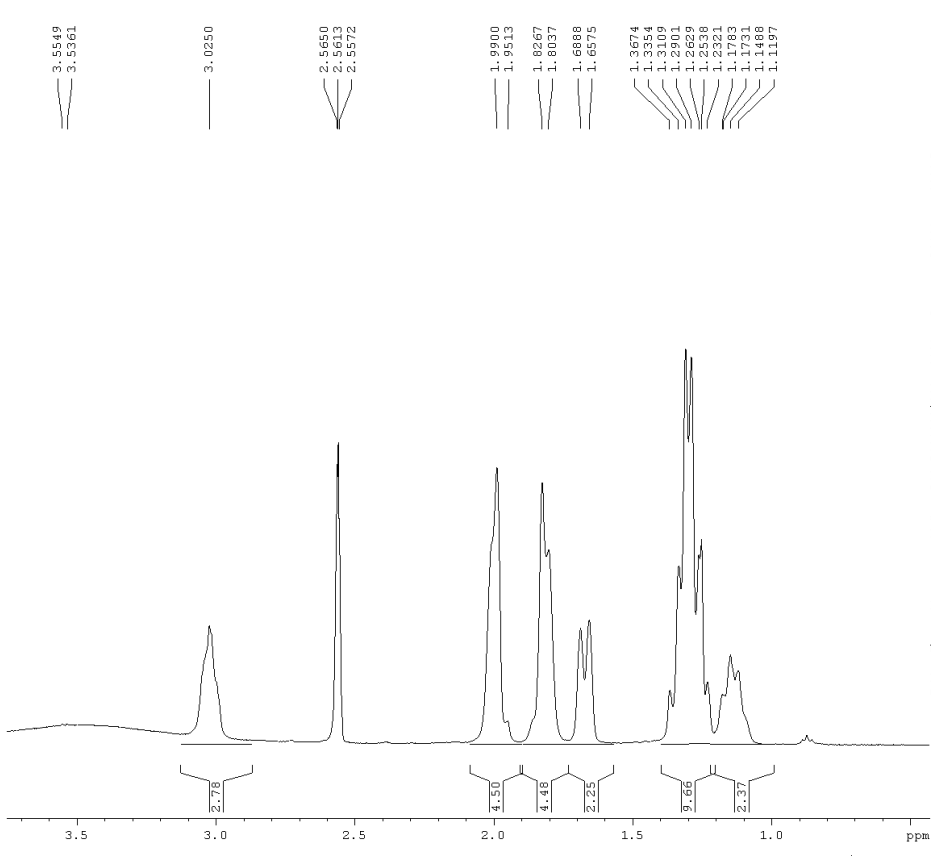

BRUKER  
 AVANCE II 400 NMR  
 Spectrometer  
 SAIF  
 Panjab University  
 Chandigarh

Current Data Parameters  
 NAME Jun13-2016  
 EXPNO 490  
 PROCNO 1

F2 - Acquisition Parameters  
 Date\_ 20160614  
 Time\_ 1.56  
 INSTRUM spect  
 PROBHD 5 mm PABBO BB-  
 PULPROG zg30  
 TD 65536  
 SOLVENT DMSO  
 NS 8  
 DS 2  
 SMH 12019.230 Hz  
 FIDRES 0.183399 Hz  
 AQ 2.7263477 sec  
 RG 203  
 DW 41.600 usec  
 DE 6.00 usec  
 TE 297.6 K  
 D1 1.00000000 sec  
 TDO 1

===== CHANNEL f1 =====  
 NUC1 1H  
 P1 10.90 usec  
 PL1 -3.00 dB  
 SFO1 400.1324710 MHz

F2 - Processing parameters  
 SI 32768  
 SF 400.1299796 MHz  
 NDMW EM  
 SSB 0  
 LB 0.30 Hz  
 GB 0  
 PC 1.00

manishkumarmanu1986@gmail.com

<sup>13</sup>CNMR 4b

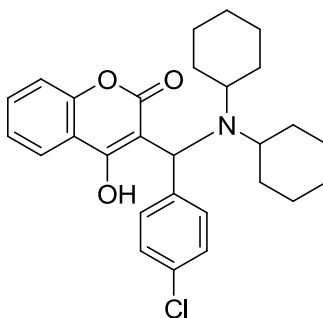

3-((4-chlorophenyl)(dicyclohexylamino)methyl)-4-hydroxy-2H-chromen-2-one

4b

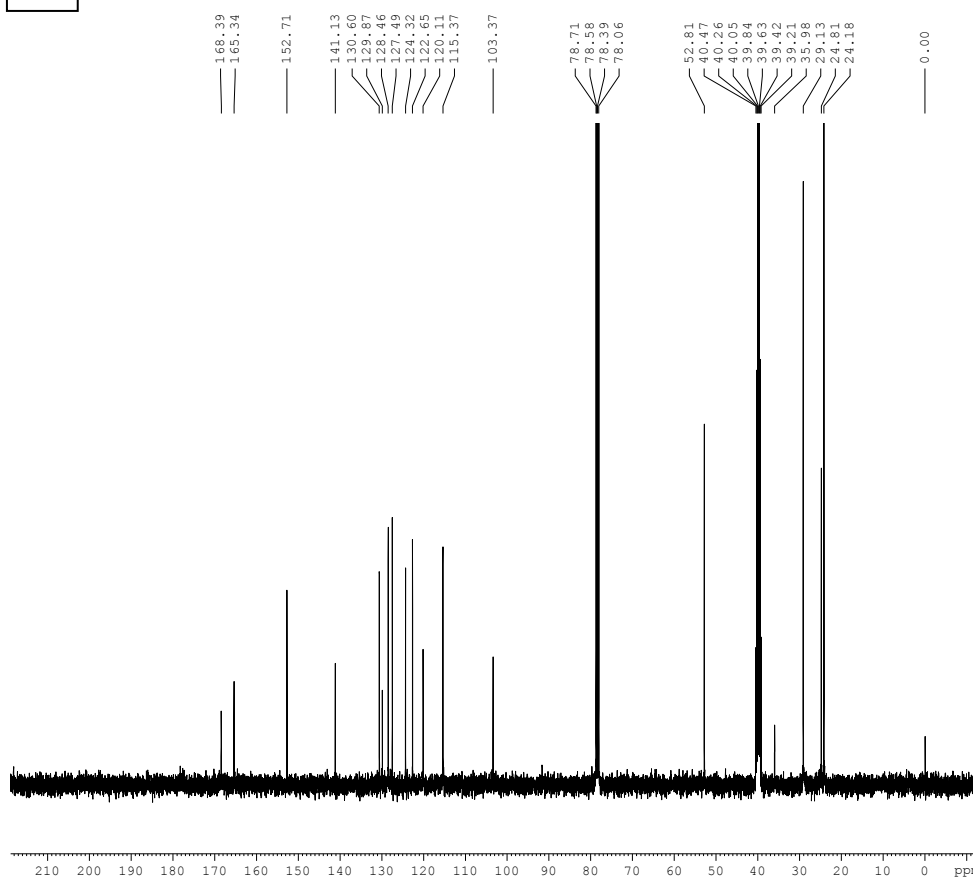

BRUKER  
AVANCE II 400 NMR  
Spectrometer  
SAIF  
Panjab University  
Chandigarh

Current Data Parameters  
NAME Jun13-2016  
EXPNO 491  
PROCNO 1  
F2 - Acquisition Parameters  
Date\_ 20160614  
Time 2.24  
INSTRUM spect  
PROBHD 5 mm PABBO BB-  
PULPROG zgpg30  
TD 65536  
SOLVENT DMSO  
NS 512  
DS 4  
SWH 29761.904 Hz  
FIDRES 0.454131 Hz  
AQ 1.1010548 sec  
RG 2050  
DW 16.800 usec  
DE 6.00 usec  
TE 297.9 K  
D1 2.00000000 sec  
d11 0.03000000 sec  
DELTA 1.89999998 sec  
TD0 1

===== CHANNEL f1 =====  
NUC1 13C  
P1 9.60 usec  
PL1 -2.00 dB  
SFO1 100.6228298 MHz

===== CHANNEL f2 =====  
CPDPRG2 waltz16  
NUC2 1H  
PCPD2 80.00 usec  
PL2 -3.00 dB  
PL12 14.31 dB  
PL13 18.00 dB  
SFO2 400.1316005 MHz

F2 - Processing parameters  
SI 32768  
SF 100.6127961 MHz  
WDW EM  
SSB 0  
LB 1.00 Hz  
GB 0  
PC 1.40

manishkumarmanu1986@gmail.com

4b

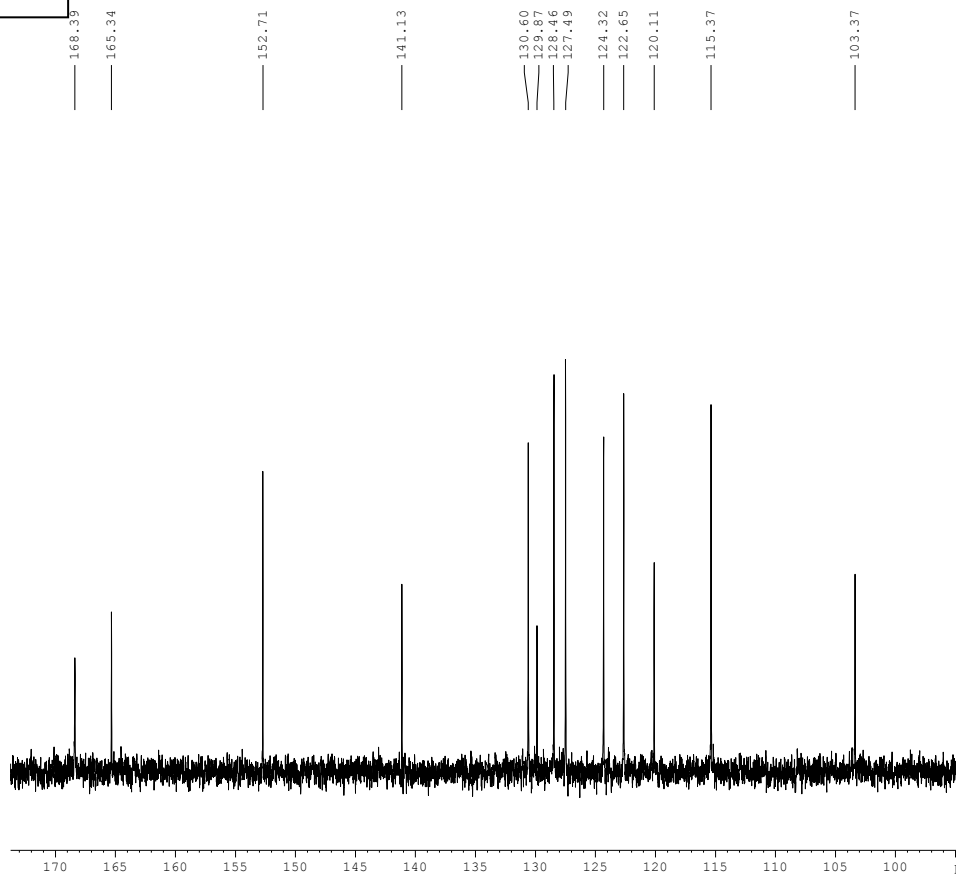

BRUKER  
AVANCE II 400 NMR  
Spectrometer  
SAIF  
Panjab University  
Chandigarh

```
Current Data Parameters
NAME      Jun13-2016
EXPNO     491
PROCNO    1

F2 - Acquisition Parameters
Date_     20160614
Time_     2.24
INSTRUM   spect
PROBHD    5 mm PABBO BB-
PULPROG   zgpg30
TD        65536
SOLVENT   DMSO
NS        512
DS        4
SWH       29761.904 Hz
FIDRES    0.454131 Hz
AQ        1.1010548 sec
RG        2050
DW        16.800 usec
DE        6.00 usec
TE        297.9 K
D1        2.00000000 sec
d11       0.03000000 sec
DELTA    1.89999998 sec
TD0       1

===== CHANNEL f1 =====
NUC1      13C
P1        9.60 usec
PL1       -2.00 dB
SFO1     100.6228298 MHz

===== CHANNEL f2 =====
CPDPRG2   waltz16
NUC2      1H
PCPD2     80.00 usec
PL2       -3.00 dB
PL12      14.31 dB
PL13      18.00 dB
SFO2     400.1316005 MHz

F2 - Processing parameters
SI        32768
SF        100.6127961 MHz
WDW       EM
SSB       0
LB        1.00 Hz
GB        0
PC        1.40
```

manishkumarmanu1986@gmail.com

# Mass spectra of **4b**

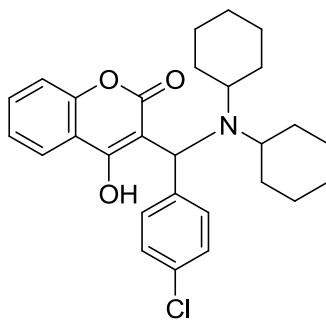

3-((4-chlorophenyl)(dicyclohexylamino)methyl)-4-hydroxy-2*H*-chromen-2-one

WATERS, Q-TOF MICROMASS (ESI-MS)

SAIF/CIL, PANJAB UNIVERSITY, CHANDIGARH  
TOF MS ES+  
5.57e4

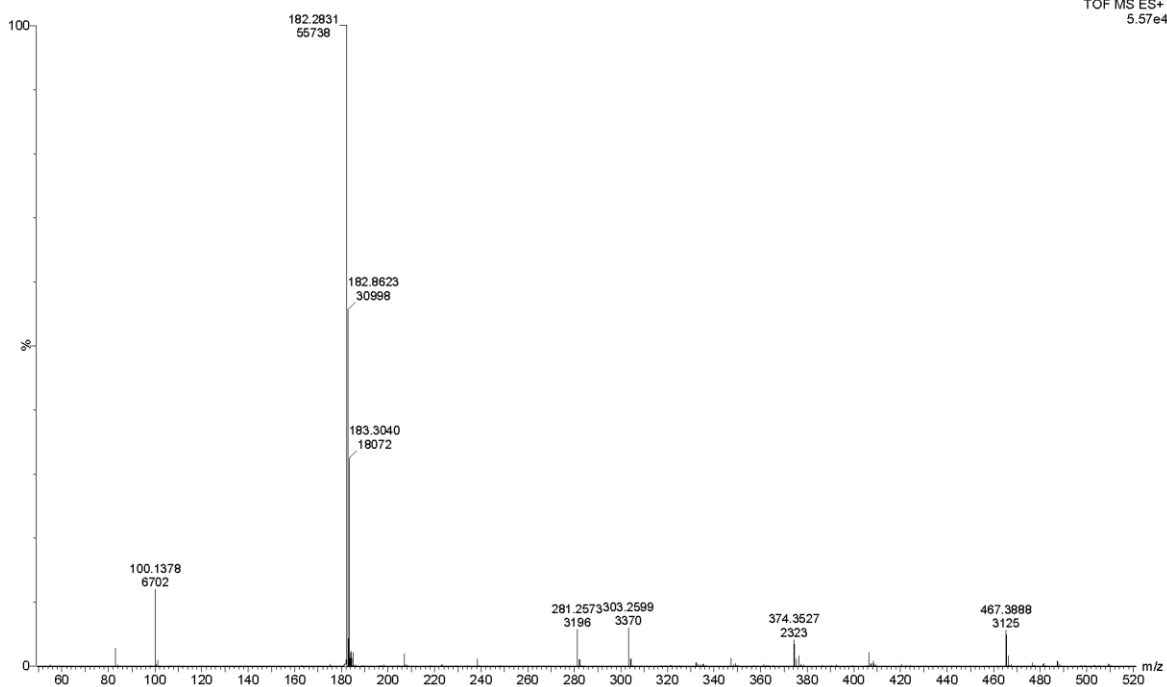



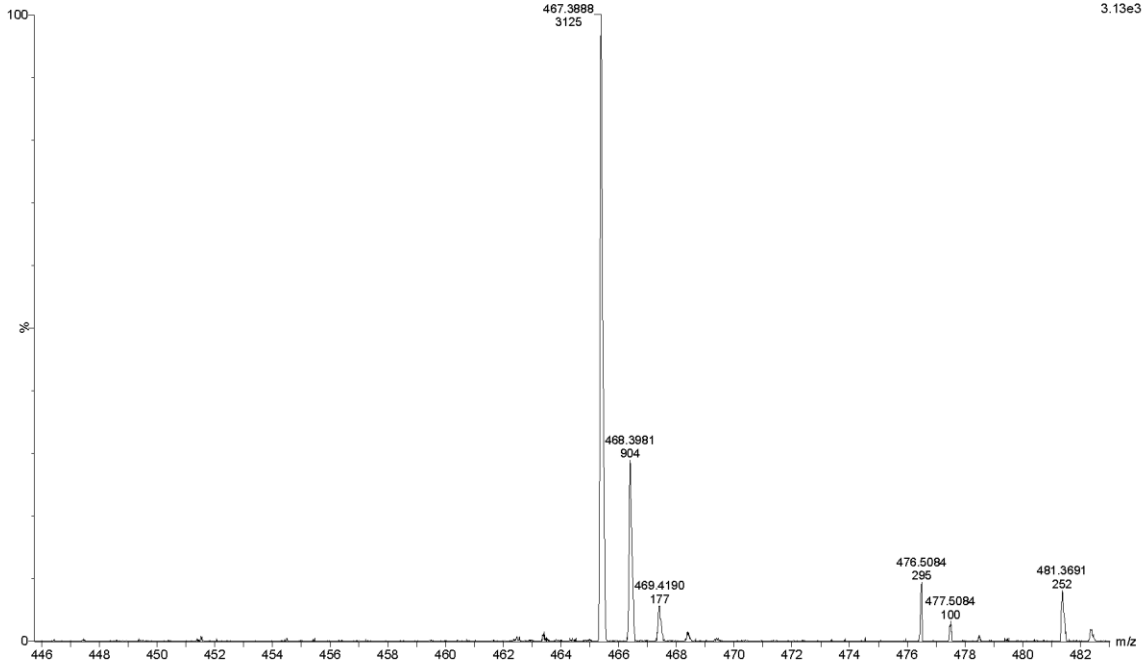

<sup>1</sup>H NMR of 4f

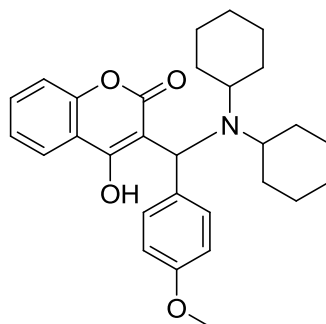

3-((Dicyclohexylamino)(4-methoxyphenyl)methyl)-4-hydroxy-2H-chromen-2-one

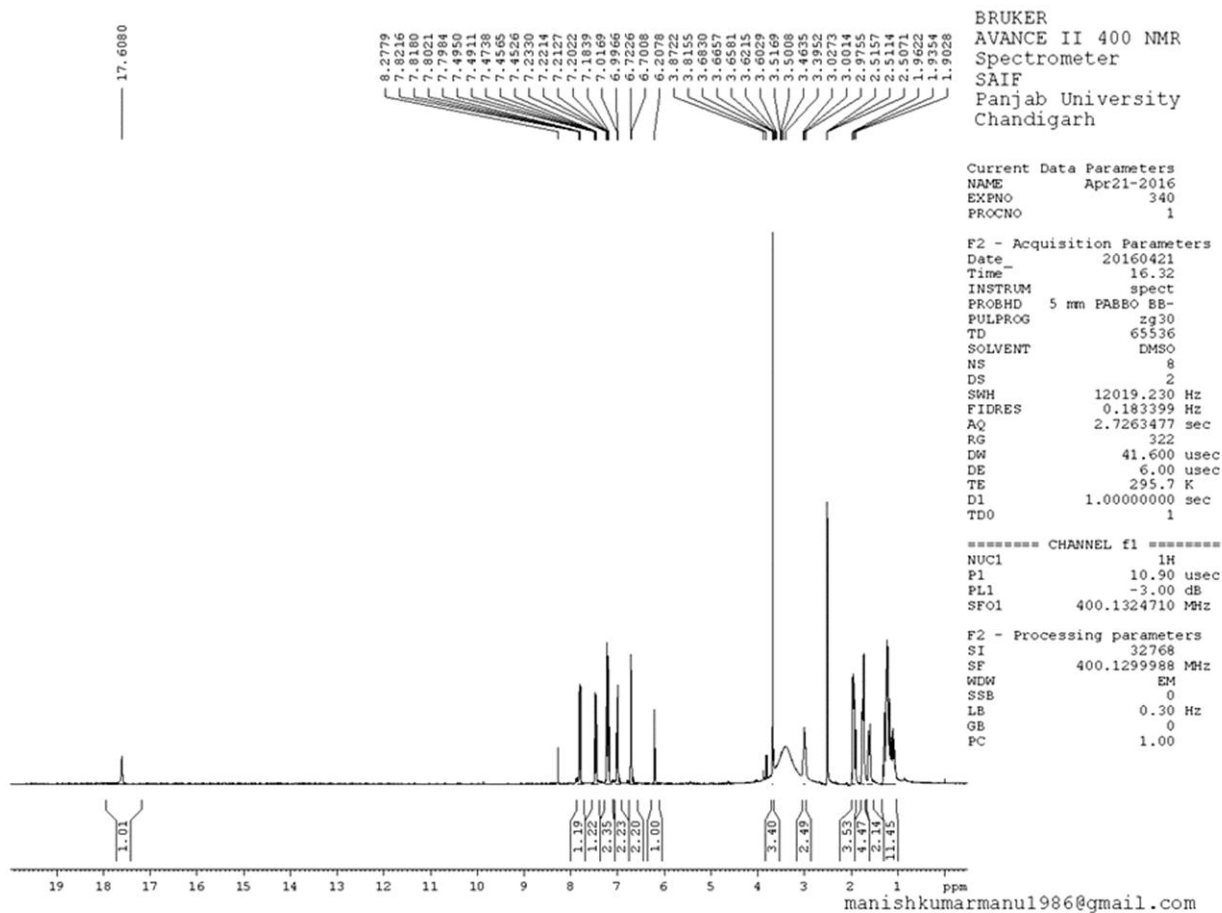

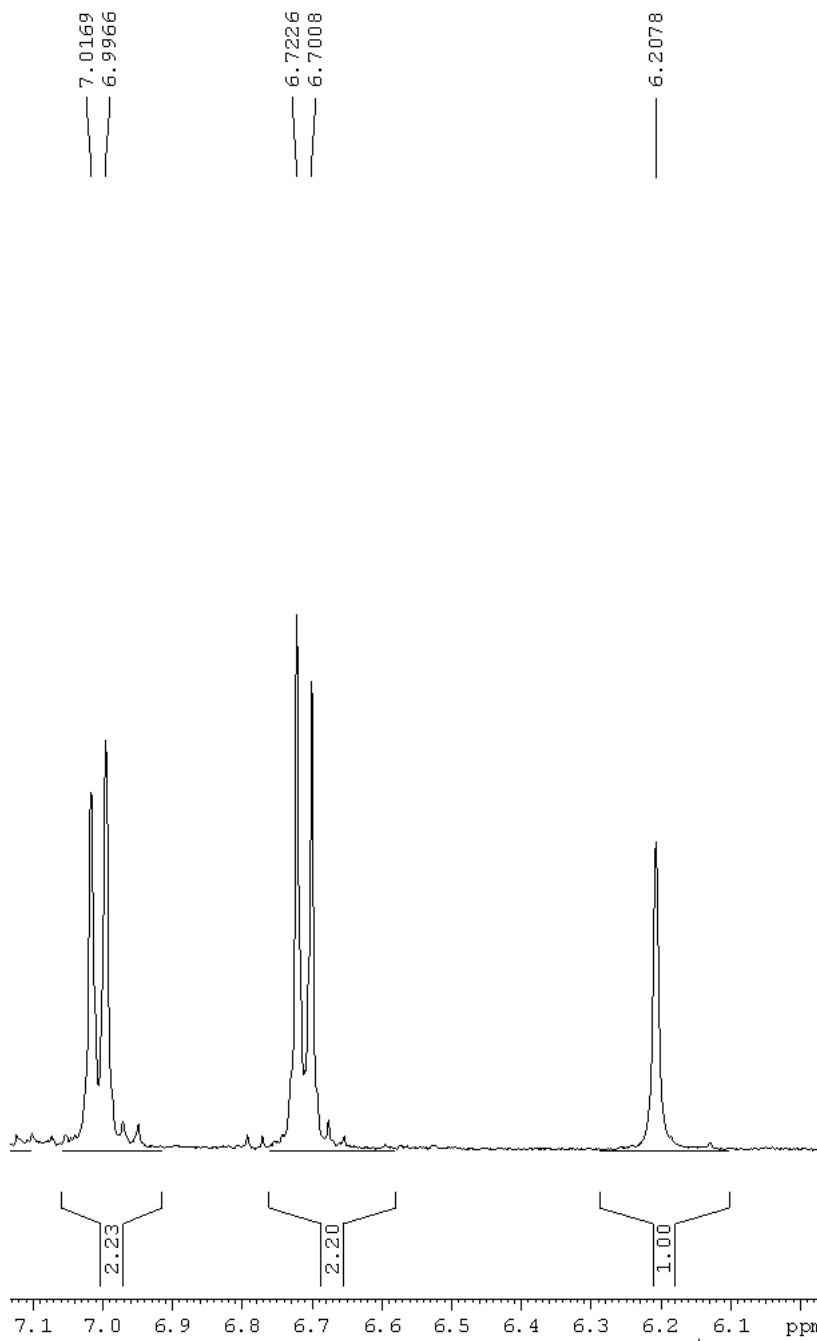

BRUKER  
 AVANCE II 400 NMR  
 Spectrometer  
 SAIF  
 Panjab University  
 Chandigarh

Current Data Parameters  
 NAME Apr21-2016  
 EXPNO 340  
 PROCNO 1

F2 - Acquisition Parameters  
 Date\_ 20160421  
 Time\_ 16.32  
 INSTRUM spect  
 PROBHD 5 mm PABBO BB-  
 PULPROG zg30  
 TD 65536  
 SOLVENT DMSO  
 NS 8  
 DS 2  
 SWH 12019.230 Hz  
 FIDRES 0.183399 Hz  
 AQ 2.7263477 sec  
 RG 322  
 DW 41.600 usec  
 DE 6.00 usec  
 TE 295.7 K  
 D1 1.00000000 sec  
 TD0 1

==== CHANNEL f1 =====  
 NUC1 1H  
 P1 10.90 usec  
 PL1 -3.00 dB  
 SFO1 400.1324710 MHz

F2 - Processing parameters  
 SI 32768  
 SF 400.1299988 MHz  
 WDW EM  
 SSB 0  
 LB 0.30 Hz  
 GB 0  
 PC 1.00

manishkumarmanu1986@gmail.com

<sup>13</sup>CNMR of 4f

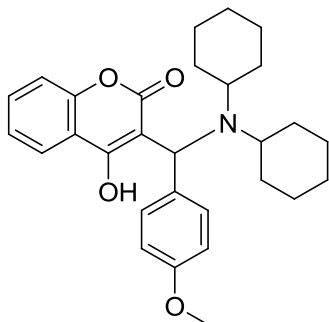

3-((Dicyclohexylamino)(4-methoxyphenyl)methyl)-4-hydroxy-2H-chromen-2-one

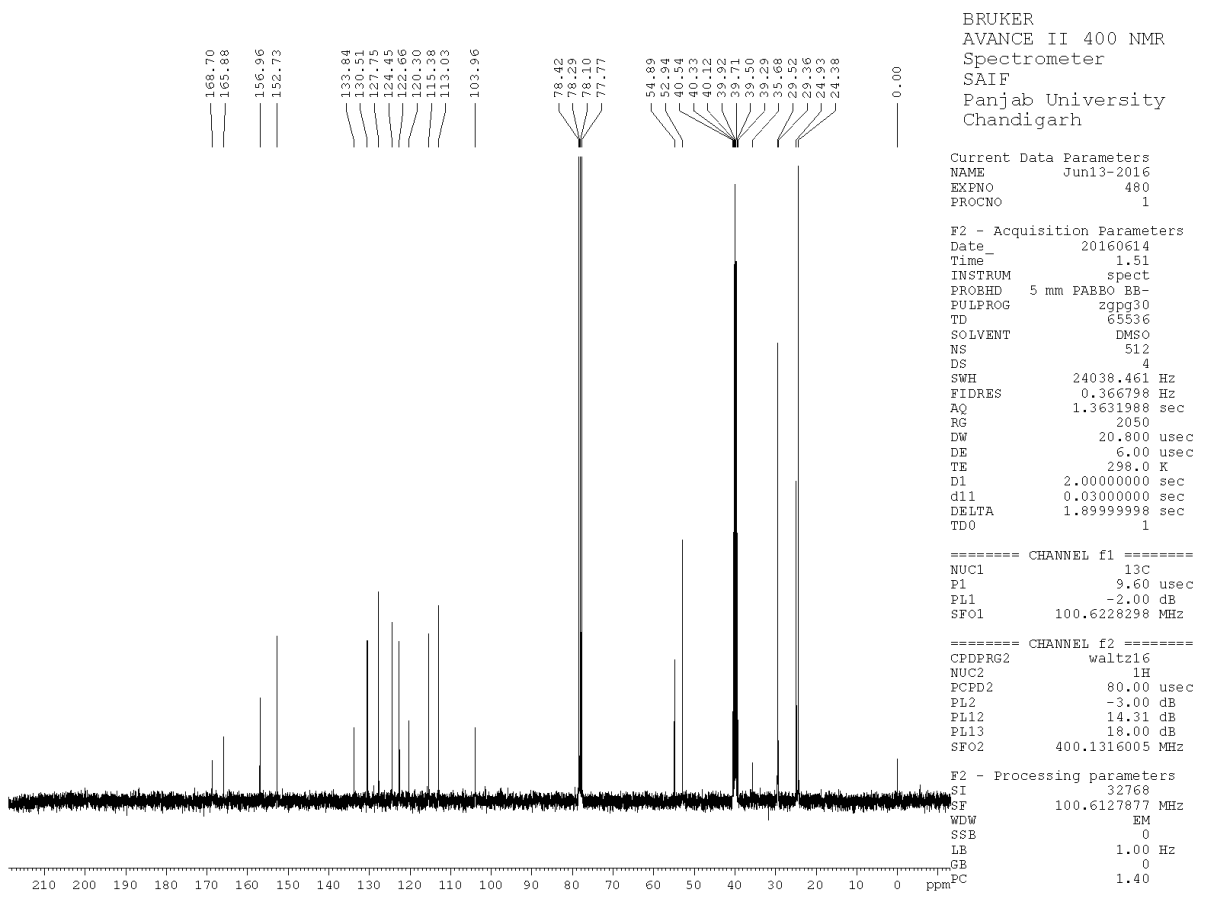

manishkumarmanu1986@gmail.com

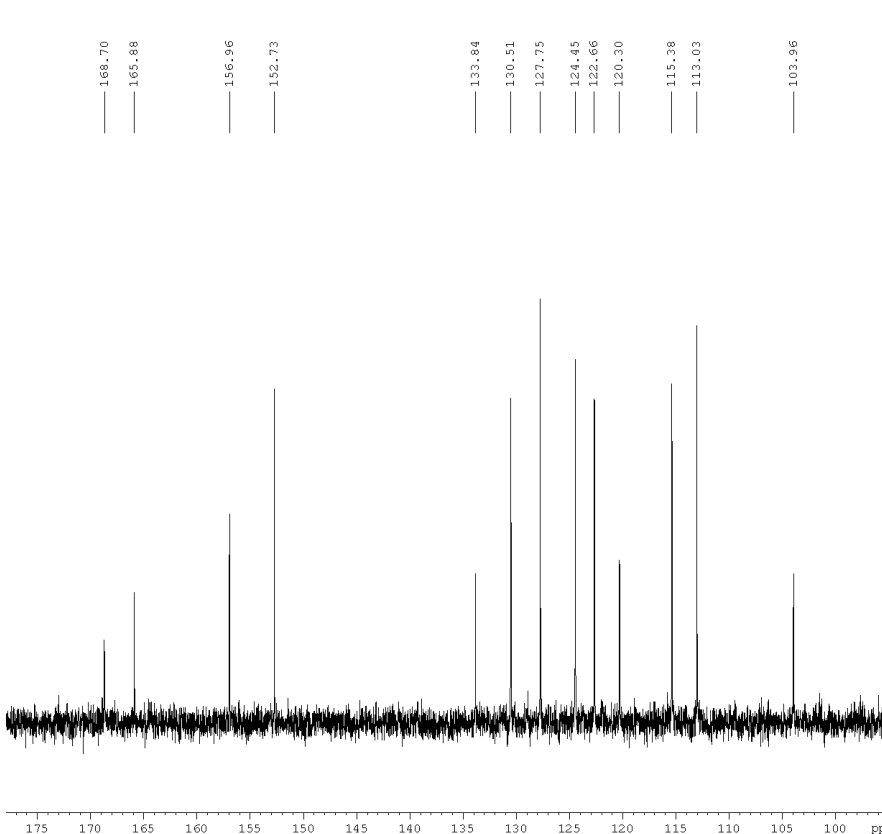

BRUKER  
 AVANCE II 400 NMR  
 Spectrometer  
 SAIF  
 Panjab University  
 Chandigarh

Current Data Parameters  
 NAME Jun13-2016  
 EXPNO 480  
 PROCNO 1

F2 - Acquisition Parameters  
 Date\_ 20160614  
 Time 1.51  
 INSTRUM spect  
 PROBHD 5 mm PABBO BE-  
 PULPROG zgpg30  
 TD 65536  
 SOLVENT DMSO  
 NS 512  
 DS 4  
 SWH 24038.461 Hz  
 FIDRES 0.366798 Hz  
 AQ 1.3631988 sec  
 RG 2050  
 DW 20.800 usec  
 DE 6.00 usec  
 TE 298.0 K  
 D1 2.00000000 sec  
 d11 0.03000000 sec  
 DELTA 1.89999998 sec  
 TD0 1

==== CHANNEL f1 =====  
 NUC1 13C  
 P1 9.60 usec  
 PL1 -2.00 dB  
 SFO1 100.6228298 MHz

==== CHANNEL f2 =====  
 CPDPRG2 waltz16  
 NUC2 1H  
 PCPD2 80.00 usec  
 PL2 -3.00 dB  
 PL12 14.31 dB  
 PL13 18.00 dB  
 SFO2 400.1316005 MHz

F2 - Processing parameters  
 SI 32768  
 SF 100.6127877 MHz  
 WDW EM  
 SSB 0  
 LB 1.00 Hz  
 GB 0  
 PC 1.40

manishkumarmanu1986@gmail.com

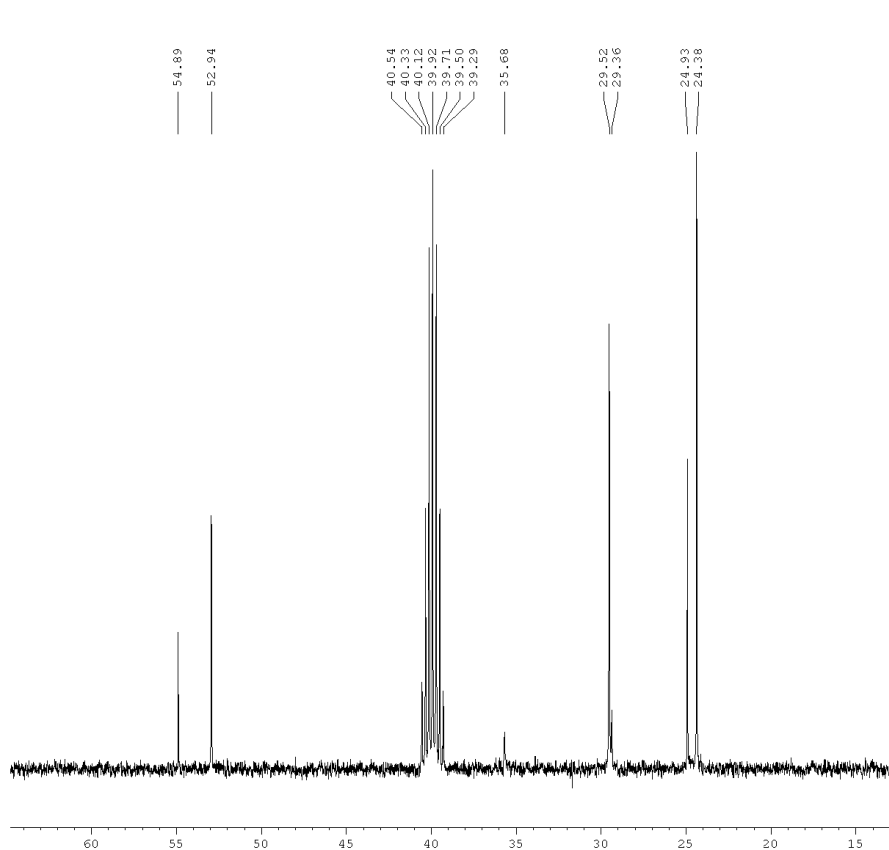

BRUKER  
 AVANCE II 400 NMR  
 Spectrometer  
 SAIF  
 Panjab University  
 Chandigarh

Current Data Parameters  
 NAME Jun13-2016  
 EXPNO 480  
 PROCNO 1

F2 - Acquisition Parameters  
 Date\_ 20160614  
 Time 1.51  
 INSTRUM spect  
 PROBHD 5 mm PABBO BB-  
 PULPROG zgpg30  
 TD 65536  
 SOLVENT DMSO  
 NS 512  
 DS 4  
 SWH 24038.461 Hz  
 FIDRES 0.366798 Hz  
 AQ 1.3631988 sec  
 RG 2050  
 DW 20.800 usec  
 DE 6.00 usec  
 TE 298.0 K  
 DI 2.0000000 sec  
 dI1 0.0300000 sec  
 DELTA 1.89999998 sec  
 TD0 1

===== CHANNEL f1 =====  
 NUC1 13C  
 P1 9.60 usec  
 PL1 -2.00 dB  
 SFO1 100.6228298 MHz

===== CHANNEL f2 =====  
 CPDPRG2 waltz16  
 NUC2 1H  
 PCPD2 80.00 usec  
 PL2 -3.00 dB  
 PL12 14.31 dB  
 PL13 18.00 dB  
 SFO2 400.1316005 MHz

F2 - Processing parameters  
 SI 32768  
 SF 100.6127877 MHz  
 WDW EM  
 SSB 0  
 LB 1.00 Hz  
 GB 0  
 PC 1.40

manishkumarmanu1986@gmail.com

# Mass spectra of **4f**

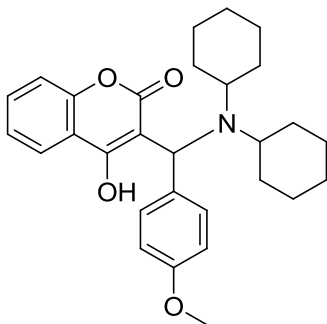

3-((Dicyclohexylamino)(4-methoxyphenyl)methyl)-4-hydroxy-2H-chromen-2-one

WATERS, Q-TOF MICROMASS (ESI-MS)

SAIF/CIL,PANJAB UNIVERSITY,CHANDIGARH  
TOF MS ES+  
1.02e4

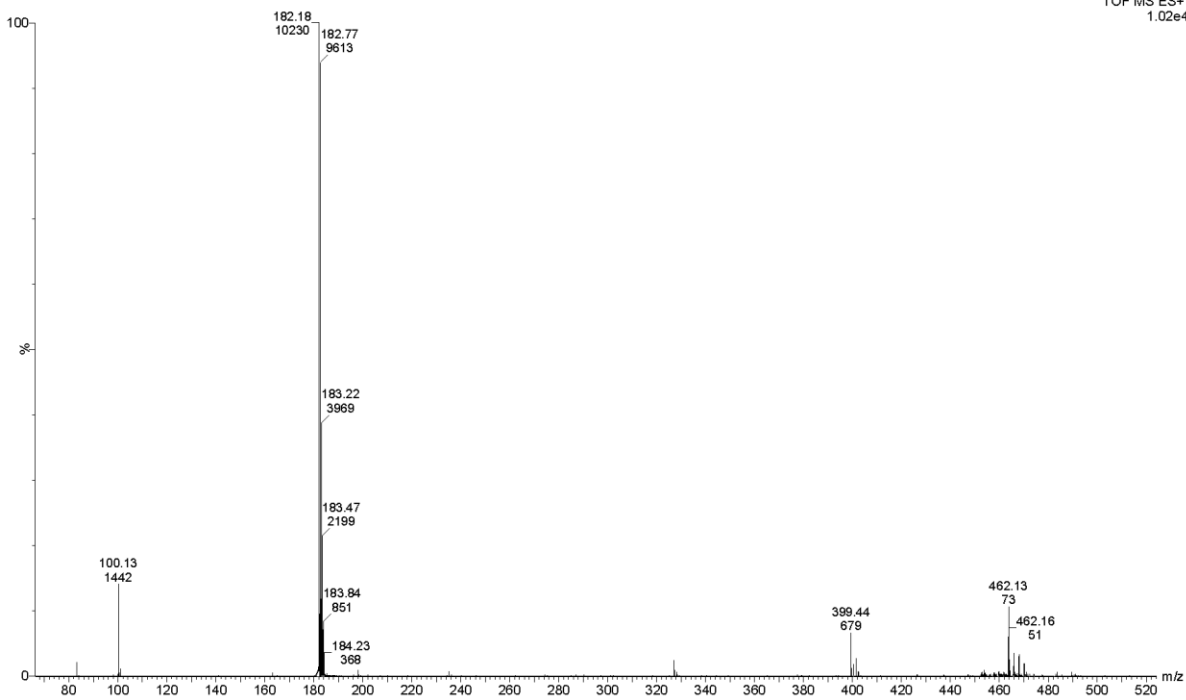

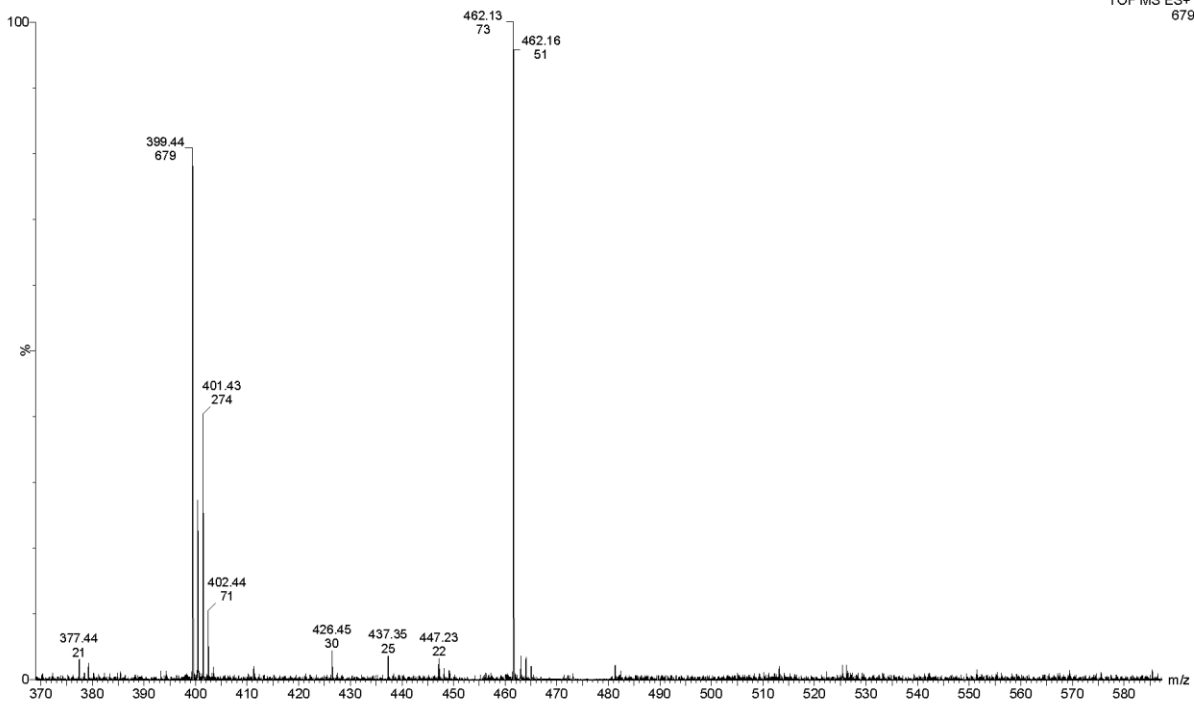



<sup>1</sup>H NMR 4n

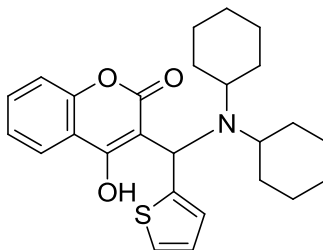

3-((Dicyclohexylamino)(thiophen-2-yl)methyl)-4-hydroxy-2H-chromen-2-one

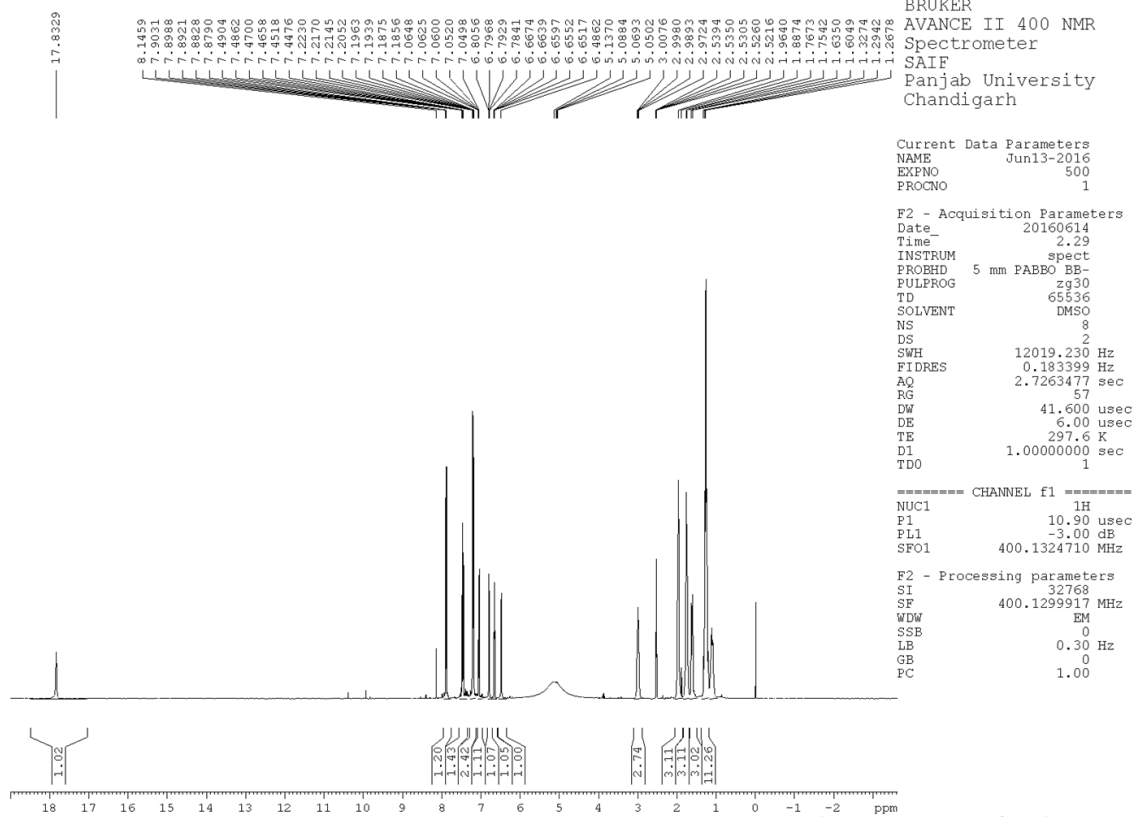

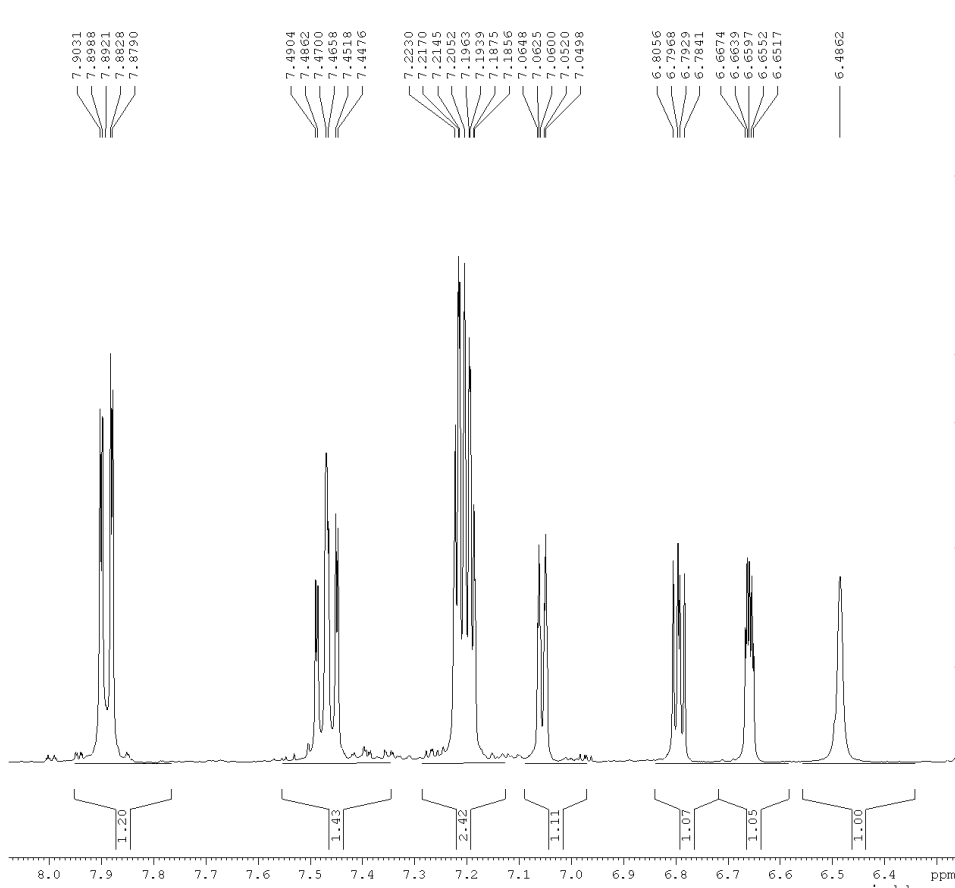

BRUKER  
 AVANCE II 400 NMR  
 Spectrometer  
 SAIF  
 Panjab University  
 Chandigarh

Current Data Parameters  
 NAME Jun13-2016  
 EXPNO 500  
 PROCNO 1

F2 - Acquisition Parameters  
 Date\_ 20160614  
 Time\_ 2.29  
 INSTRUM spect  
 PROBHD 5 mm PABBO BB-  
 PULPROG zg30  
 TD 65536  
 SOLVENT DMSO  
 NS 8  
 DS 2  
 SWH 12019.230 Hz  
 FIDRES 0.183399 Hz  
 AQ 2.7263477 sec  
 RG 57  
 DW 41.600 usec  
 DE 6.00 usec  
 TE 297.6 K  
 D1 1.00000000 sec  
 TDO 1

===== CHANNEL f1 =====  
 NUC1 1H  
 P1 10.90 usec  
 PL1 -3.00 dB  
 SFO1 400.1324710 MHz

F2 - Processing parameters  
 SI 32768  
 SF 400.1299917 MHz  
 WDW EM  
 SSB 0  
 LB 0.30 Hz  
 GB 0  
 PC 1.00

manishkumarmanu1986@gmail.com

<sup>13</sup>CNMR 4n



3-((Dicyclohexylamino)(thiophen-2-yl)methyl)-4-hydroxy-2H-chromen-2-one

4n

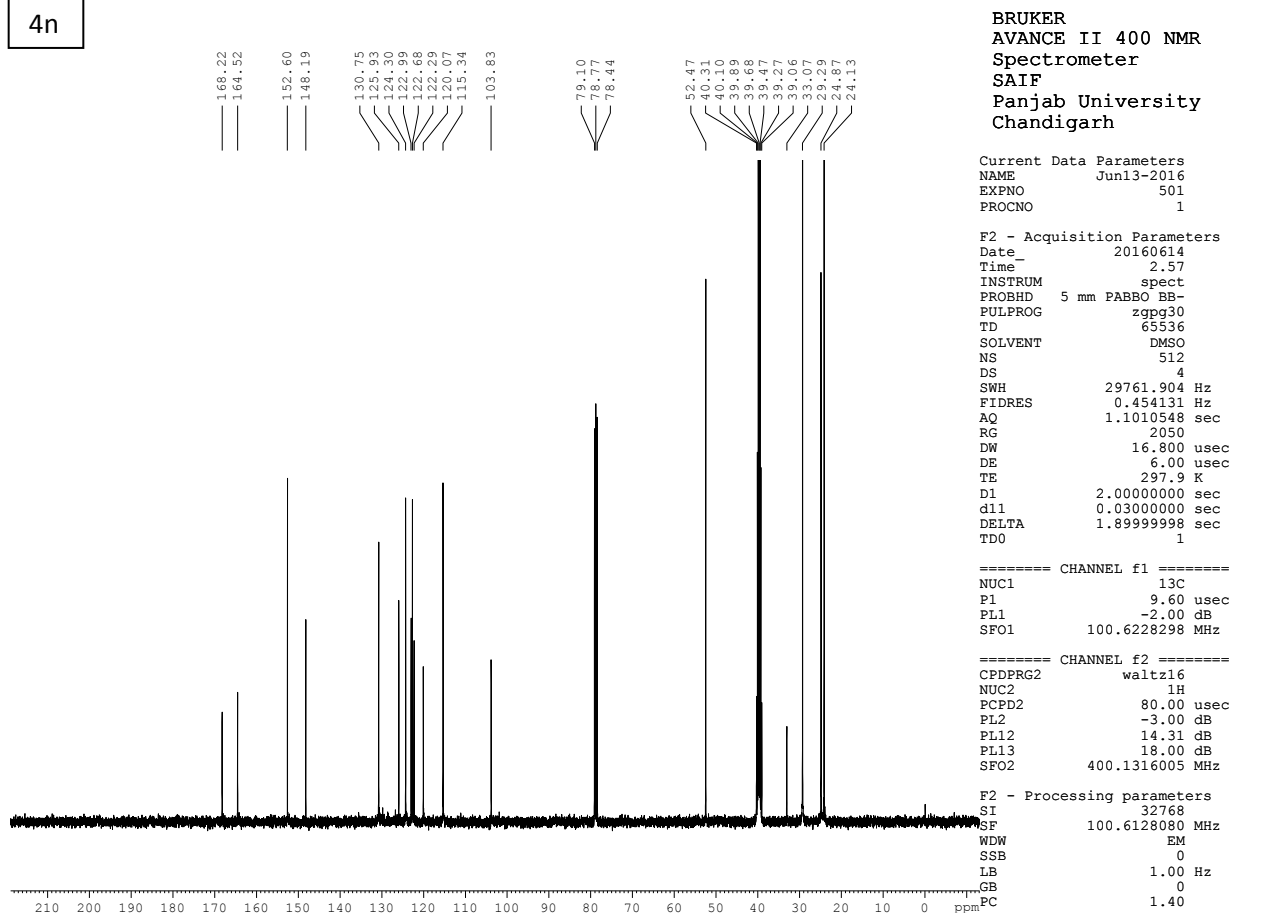

manishkumarmanu1986@gmail.com

4n

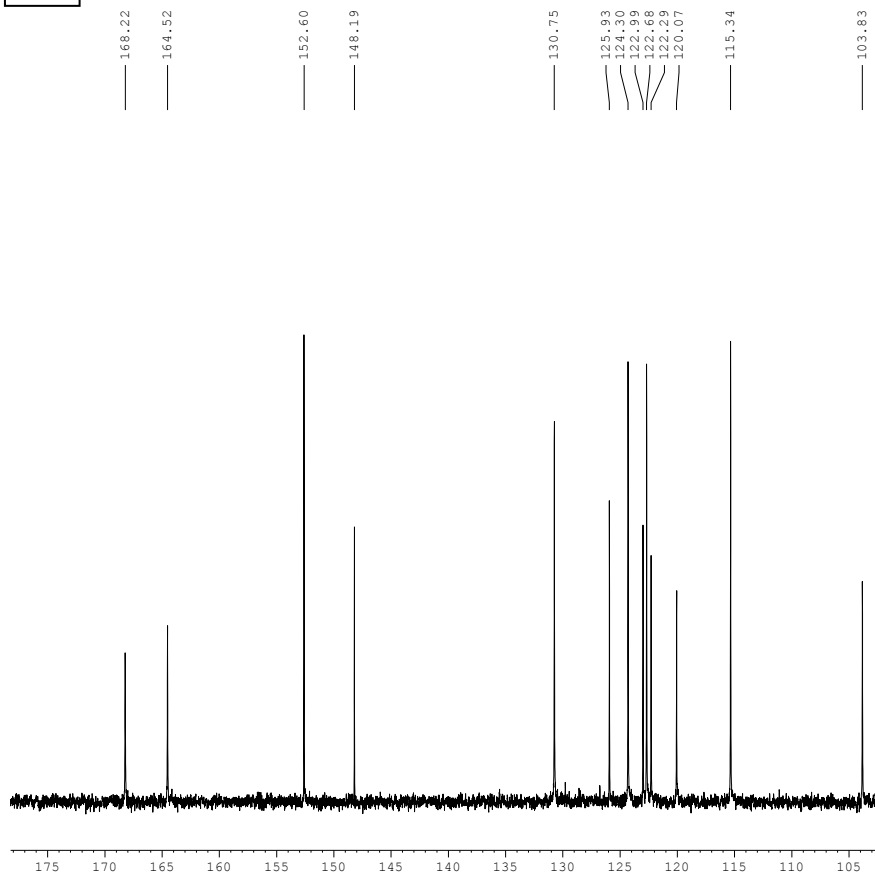

BRUKER  
AVANCE II 400 NMR  
Spectrometer  
SAIF  
Panjab University  
Chandigarh

Current Data Parameters  
NAME Jun13-2016  
EXPNO 501  
PROCNO 1

F2 - Acquisition Parameters  
Date\_ 20160614  
Time\_ 2.57  
INSTRUM spect  
PROBHD 5 mm PABBO BB-  
PULPROG zgpg30  
TD 65536  
SOLVENT DMSO  
NS 512  
DS 4  
SWH 29761.904 Hz  
FIDRES 0.454131 Hz  
AQ 1.1010548 sec  
RG 2050  
DW 16.800 usec  
DE 6.00 usec  
TE 297.9 K  
D1 2.00000000 sec  
d11 0.03000000 sec  
DELTA 1.89999998 sec  
TDO 1

===== CHANNEL f1 =====  
NUC1 13C  
P1 9.60 usec  
PL1 -2.00 dB  
SFO1 100.6228298 MHz

===== CHANNEL f2 =====  
CPDPRG2 waltz16  
NUC2 1H  
PCPD2 80.00 usec  
PL2 -3.00 dB  
PL12 14.31 dB  
PL13 18.00 dB  
SFO2 400.1316005 MHz

F2 - Processing parameters  
SI 32768  
SF 100.6128080 MHz  
WDW EM  
SSB 0  
LB 1.00 Hz  
GB 0  
PC 1.40

manishkumarmanu1986@gmail.com

# Mass spectra of **4n**

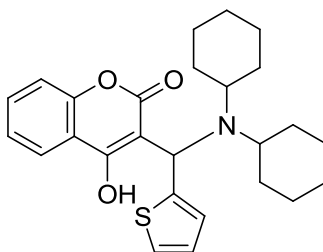

3-((Dicyclohexylamino)(thiophen-2-yl)methyl)-4-hydroxy-2H-chromen-2-one

WATERS, Q-TOF MICROMASS (ESI-MS)

SAIF/CIL,PANJAB UNIVERSITY,CHANDIGARH  
TOF MS ES+  
1.85e4

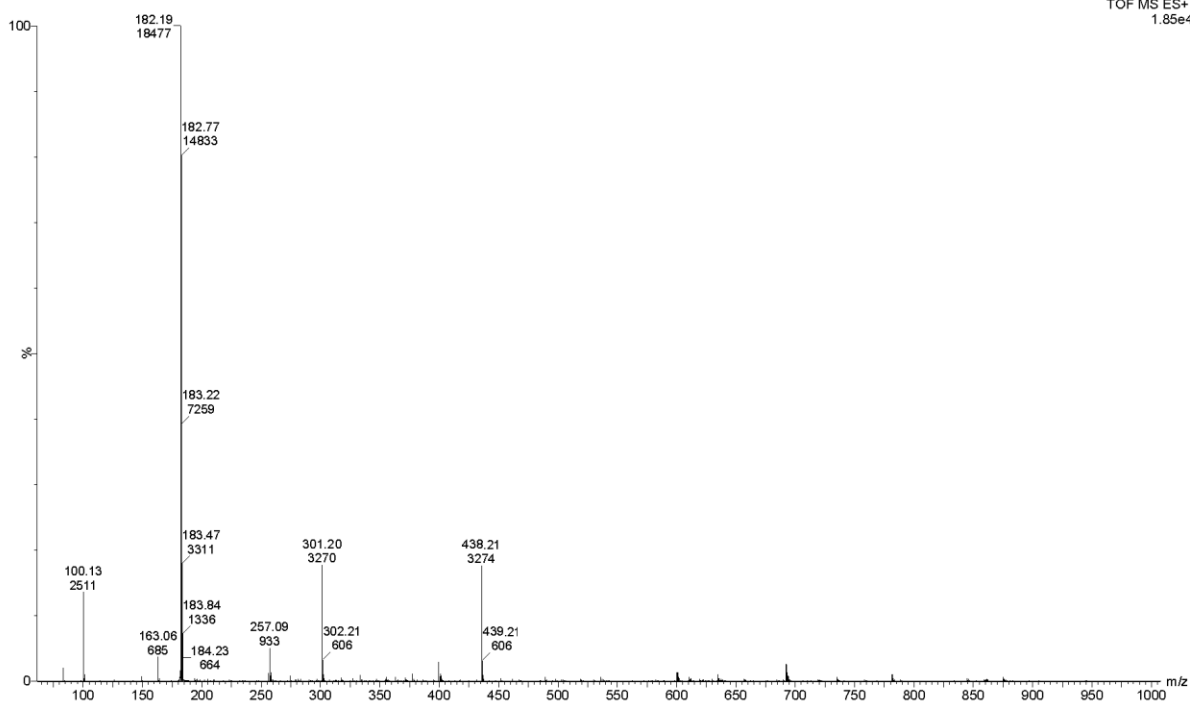

Supplement: molecules-22-01172-s001.pdf [file molecules-22-01172-s001.pdf]
